# Supplementary material for: Ocean-wave phenomenon around Japan Island due to the 2022 Tonga eruption observed by the wide and dense ocean-bottom pressure gauge networks
Source: Research Square preprint supplement (doi:10.21203/rs.3.rs-1464766/v1), 2022-03-22
Supplement: Supplementary file 1 [file b555b48a57b7785db1d59d5d.pdf]

1 **Additional file 1 for**

2 **Ocean-wave phenomenon around Japan Island due to the 2022 Tonga eruption**

3 **observed by the wide and dense ocean-bottom pressure gauge networks**

4 by Hisahiko Kubo, Tatsuya Kubota, Wataru Suzuki, Shin Aoi, Osamu Sandanbata,

5 Naotaka Chikasada, Hideki Ueda

6

7 Ocean-bottom pressure waveforms and scalograms with the results of semblance

8 analyses for 16 stations are shown in Fig. A1. The waveform trace of ocean-bottom

9 pressure from near-trench S-net stations to near-coast S-net stations is shown in Fig.

10 A2. The waveform trace of ocean-bottom pressure at S-net and DONET station and

11 atmospheric pressure at V-net stations along the geodesic distance from the Hunga

12 Tonga–Hunga Ha’apai volcano is shown in Fig. A3.

13

14

15

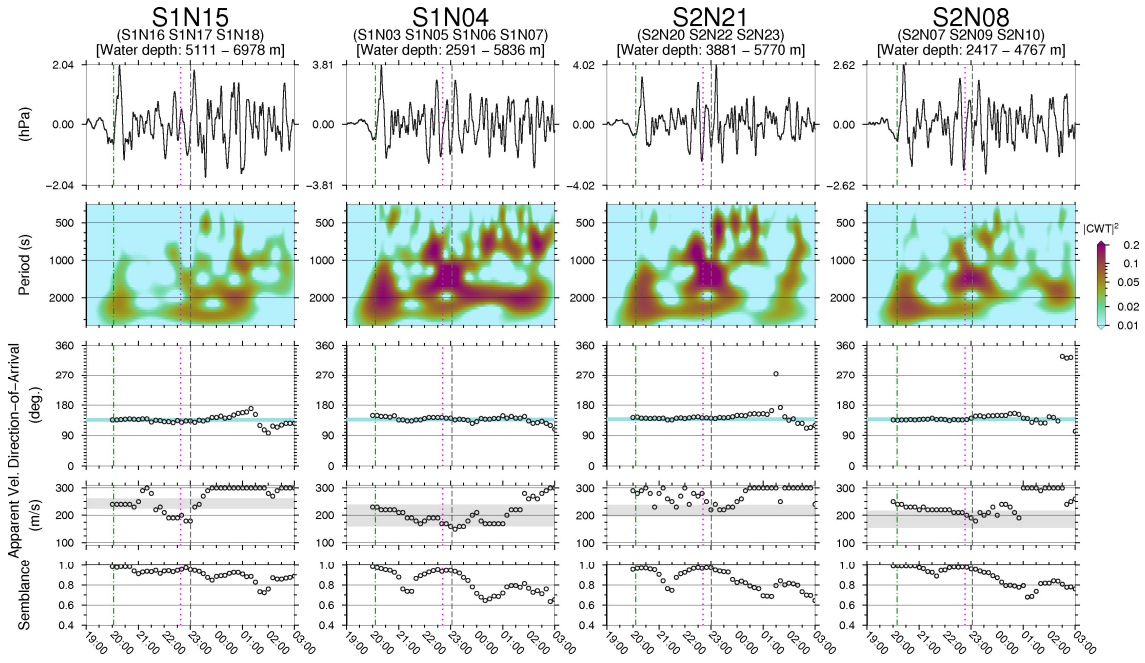

16

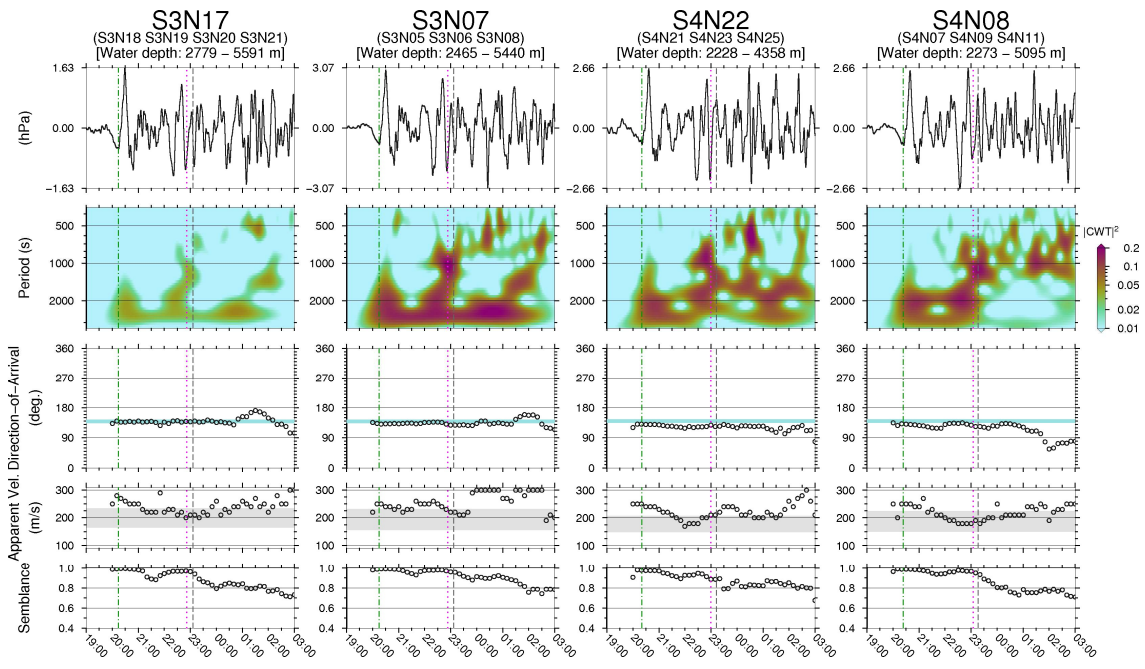

17

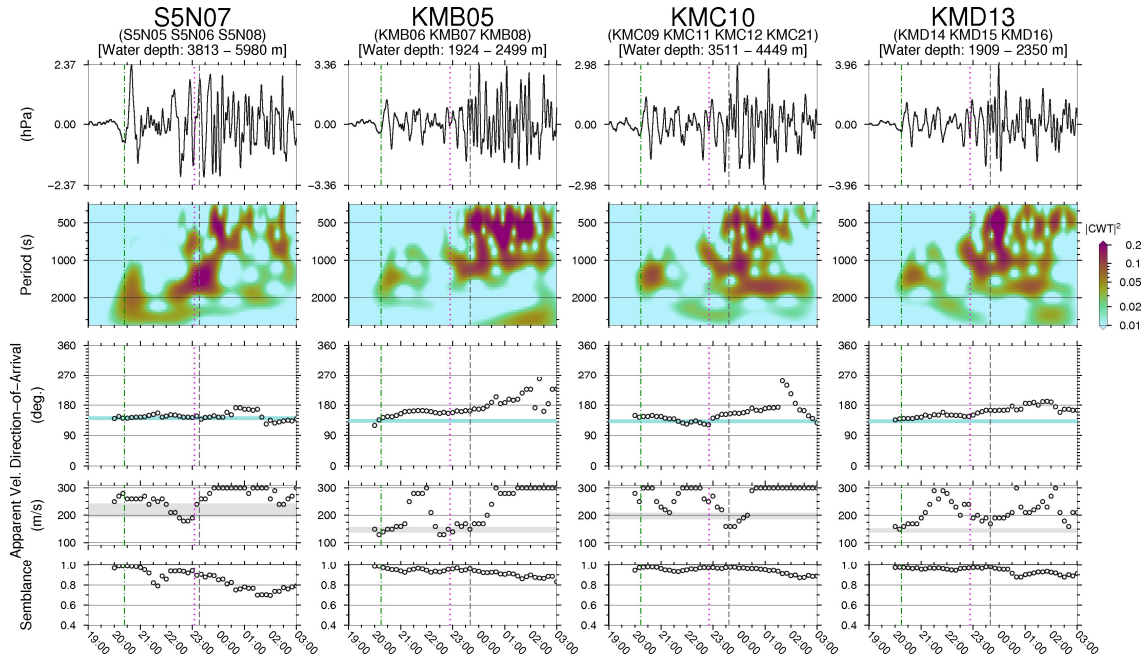

18

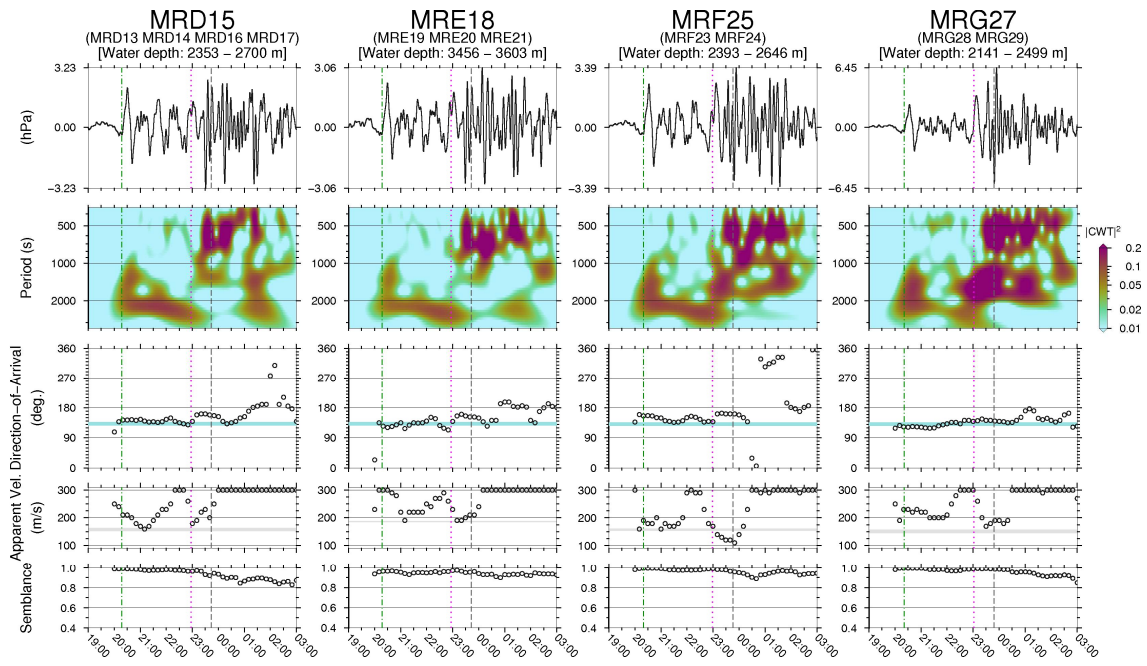

19 Fig. A1

20 Ocean-bottom pressure waveforms and scalograms at S1N15, S1N04, S2N21, S2N08,

21 S3N17, S3N07, S4N22, S4N08, S5N07, KMB05, KMC10, KMD13, MRD15, MRE18,

22 MRF25, and MRG27. The results of the semblance analysis using waveforms at each  
23 station and their neighboring stations (listed in parentheses) are also shown. Cyan lines  
24 in the plots of direction-of-arrival indicate the direction of the great circle from each  
25 station to the Hunga Tonga – Hunga Ha’apai volcano. Gray shading in the plots of  
26 apparent velocity denotes the propagation velocity range expected for the water depth of  
27 the stations in each array. Gray broken lines indicate theoretical arrival times of direct  
28 tsunamis. Green and pink bars indicate the theoretical travel times assuming  
29 propagation along the great circle path from the Hunga Tonga–Hunga Ha’apai volcano  
30 with velocities of 300 and 220 m/s, respectively.  
31

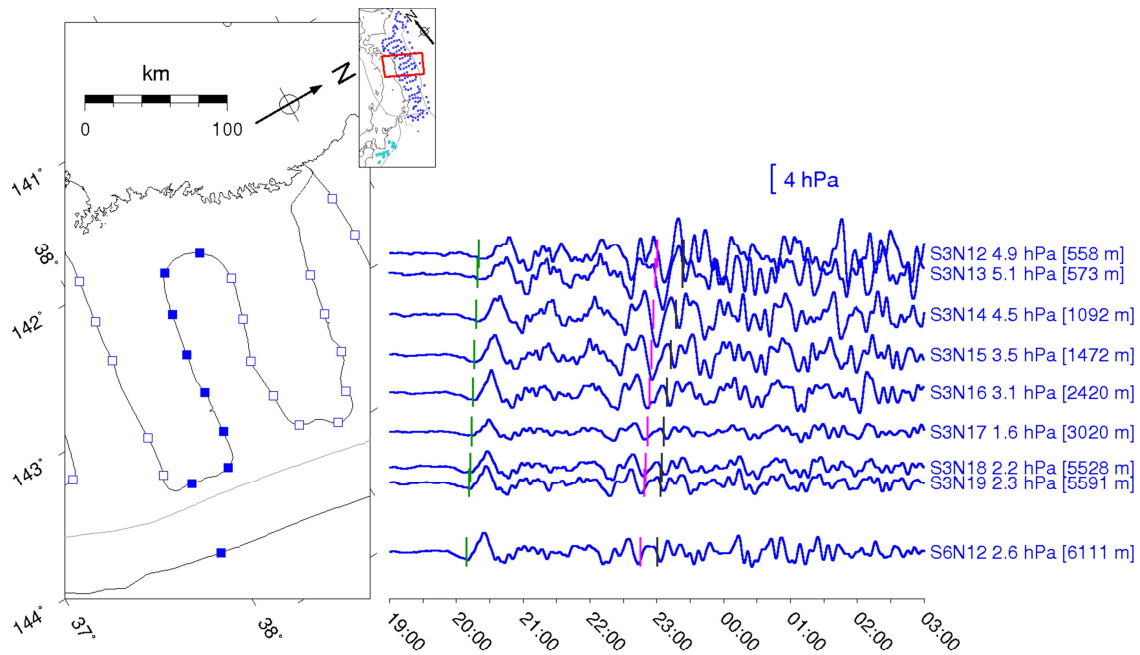

32

33 Fig. A2

34 Waveform trace of ocean-bottom pressure from near-trench S-net stations to near-coast

35 S-net stations. Solid squares in the left map denote the stations for which waveform

36 records are shown. Black bars indicate the theoretical arrival times of direct tsunamis.

37 Green and pink bars indicate the theoretical travel times assuming the propagation along

38 the great circle path from the Hunga Tonga–Hunga Ha’apai volcano at velocities of 300

39 and 220 m/s, respectively.

40



49 theoretical travel times assuming propagation along the great circle path from the  
50 Hunga Tonga–Hunga Ha’apai volcano at velocities of 300 and 220 m/s, respectively.

51 (b) Station distribution of S-net, DONET, and V-net. Blue and cyan squares indicate S-  
52 net and DONET stations used in this study, respectively. Red circles indicate V-net  
53 stations used in this study. Solid squares and circles denote stations for which waveform  
54 records are shown in Fig. A2a.

55

56
